# Supplementary material
Source: PubMed Central journal article supplement (PMC6963012)
Supplement: ijcep0011-5413-f3.pdf [file ijcep0011-5413-f3.pdf]

## Clinical performance of HPV detection and genotyping in urine samples

**Supplementary Table 1.** Characteristics of all patients include in this study

| Histological-ly confirmed Lesion | Age | Cervical-based sampling |                                         |                                            |                                            |                                  | Urine-based sampling      |                                         |                                            |                                            |                                  |
|----------------------------------|-----|-------------------------|-----------------------------------------|--------------------------------------------|--------------------------------------------|----------------------------------|---------------------------|-----------------------------------------|--------------------------------------------|--------------------------------------------|----------------------------------|
|                                  |     | HPV Genotyping          | ANY HPV type (0: negative; 1: positive) | ANY HR-HPV type (0: negative; 1: positive) | ANY LR-HPV type (0: negative; 1: positive) | HPV16 (0: negative; 1: positive) | HPV Genotyping            | ANY HPV type (0: negative; 1: positive) | ANY HR-HPV type (0: negative; 1: positive) | ANY LR-HPV type (0: negative; 1: positive) | HPV16 (0: negative; 1: positive) |
| CIN 1                            | 24  | 16                      | 1                                       | 1                                          | 0                                          | 1                                | 18                        | 1                                       | 1                                          | 0                                          | 0                                |
| CIN 1                            | 29  | 18                      | 1                                       | 1                                          | 0                                          | 0                                | 33, 18, 39, 53, 70        | 1                                       | 1                                          | 0                                          | 0                                |
| CIN 2                            | 40  | 16                      | 0                                       | 0                                          | 0                                          | 1                                | 18, 45                    | 0                                       | 0                                          | 0                                          | 0                                |
| CIN 1                            | 24  | 58                      | 0                                       | 0                                          | 0                                          | 0                                | 58                        | 0                                       | 0                                          | 0                                          | 0                                |
| CIN 2                            | 41  | 56                      | 0                                       | 0                                          | 0                                          | 0                                | 56                        | 0                                       | 0                                          | 0                                          | 0                                |
| CIN 1                            | 47  | 18                      | 0                                       | 0                                          | 0                                          | 0                                | 33, 18, 45                | 0                                       | 0                                          | 0                                          | 0                                |
| CIN 2                            | 29  | 45                      | 1                                       | 1                                          | 0                                          | 0                                | 18, 51, 45, 6, 42, 11, 70 | 1                                       | 1                                          | 0                                          | 0                                |
| CIN 2                            | 22  | 58                      | 0                                       | 0                                          | 0                                          | 0                                | 59                        | 0                                       | 0                                          | 0                                          | 0                                |
| CIN 2                            | 27  | 16                      | 0                                       | 0                                          | 0                                          | 1                                | 16, 18                    | 0                                       | 0                                          | 0                                          | 1                                |
| SCC                              | 56  | 16                      | 0                                       | 0                                          | 0                                          | 1                                | 16, 18                    | 0                                       | 0                                          | 0                                          | 1                                |
| CIN 1                            | 61  | 16, 52                  | 0                                       | 0                                          | 0                                          | 1                                | 0                         | 1                                       | 0                                          | 1                                          | 0                                |
| CIN 1                            | 27  | 18                      | 0                                       | 0                                          | 0                                          | 0                                | 18, 45, 6, 11             | 0                                       | 0                                          | 0                                          | 0                                |
| CIN 1                            | 50  | 16                      | 0                                       | 0                                          | 0                                          | 1                                | 0                         | 0                                       | 0                                          | 0                                          | 0                                |
| CIN 1                            | 37  | 83                      | 0                                       | 0                                          | 0                                          | 0                                | 16, 56, 59, 45            | 0                                       | 0                                          | 0                                          | 1                                |
| CIN 1                            | 47  | 45                      | 0                                       | 0                                          | 0                                          | 0                                | 16, 18, 52, 35, 45, 11    | 0                                       | 0                                          | 0                                          | 1                                |
| CIN 3                            | 32  | 18                      | 0                                       | 0                                          | 0                                          | 0                                | 16, 18, 35, 11            | 0                                       | 0                                          | 0                                          | 1                                |
| CIN 3                            | 28  | 16, 18, 56              | 0                                       | 0                                          | 0                                          | 1                                | 16, 56, 18                | 0                                       | 0                                          | 0                                          | 1                                |
| CIN 3                            | 23  | 16                      | 0                                       | 0                                          | 0                                          | 1                                | 0                         | 0                                       | 0                                          | 0                                          | 0                                |
| CIN 3                            | 35  | 68                      | 0                                       | 0                                          | 0                                          | 0                                | 42                        | 0                                       | 0                                          | 0                                          | 0                                |
| CIN 3                            | 34  | 45                      | 1                                       | 1                                          | 0                                          | 0                                | 0                         | 0                                       | 0                                          | 0                                          | 0                                |
| CIN 1                            | 44  | 45                      | 0                                       | 0                                          | 0                                          | 0                                | 16, 18                    | 0                                       | 0                                          | 0                                          | 1                                |
| CIN 2                            | 31  | 16                      | 1                                       | 1                                          | 0                                          | 1                                | 31                        | 0                                       | 0                                          | 0                                          | 0                                |
| CIN 3                            | 43  | 45                      | 0                                       | 0                                          | 0                                          | 0                                | 31                        | 0                                       | 0                                          | 0                                          | 0                                |
| CIN 3                            | 34  | 16, 18, 52              | 0                                       | 0                                          | 0                                          | 1                                | 16, 18, 35                | 0                                       | 0                                          | 0                                          | 1                                |
| CIN 1                            | 32  | 66                      | 0                                       | 0                                          | 0                                          | 0                                | 52, 66                    | 1                                       | 1                                          | 0                                          | 0                                |
| CIN 2                            | 31  | 16                      | 0                                       | 0                                          | 0                                          | 1                                | 0                         | 1                                       | 0                                          | 1                                          | 0                                |
| CIN 2                            | 26  | 16                      | 0                                       | 0                                          | 0                                          | 1                                | 16                        | 0                                       | 0                                          | 0                                          | 1                                |
| CIN 3                            | 37  | 16                      | 0                                       | 0                                          | 0                                          | 1                                | 18                        | 0                                       | 0                                          | 0                                          | 0                                |
| SCC                              | 38  | 16                      | 0                                       | 0                                          | 0                                          | 1                                | 16                        | 0                                       | 0                                          | 0                                          | 1                                |
| CIN 1                            | 40  | 66                      | 1                                       | 1                                          | 0                                          | 0                                | 0                         | 0                                       | 0                                          | 0                                          | 0                                |
| CIN 3                            | 31  | 16                      | 0                                       | 0                                          | 0                                          | 1                                | 16, 18                    | 1                                       | 1                                          | 0                                          | 1                                |
| CIN 2                            | 38  | 66                      | 0                                       | 0                                          | 0                                          | 0                                | 18                        | 1                                       | 1                                          | 0                                          | 0                                |
| CIN 1                            | 46  | 45                      | 0                                       | 0                                          | 0                                          | 0                                | 18                        | 0                                       | 0                                          | 0                                          | 0                                |

## Clinical performance of HPV detection and genotyping in urine samples

|       |    |        |   |   |   |   |                                              |   |   |   |   |
|-------|----|--------|---|---|---|---|----------------------------------------------|---|---|---|---|
| CIN 1 | 61 | 16, 45 | 1 | 1 | 0 | 1 | 0                                            | 1 | 1 | 0 | 0 |
| SCC   | 35 | 16     | 0 | 0 | 0 | 1 | 16, 42                                       | 0 | 0 | 0 | 1 |
| CIN 1 | 52 | 16     | 0 | 0 | 0 | 1 | 0                                            | 0 | 0 | 0 | 0 |
| CIN 3 | 40 | 16     | 0 | 0 | 0 | 1 | 16, 39, 53, 11                               | 1 | 1 | 0 | 1 |
| SCC   | 31 | 16     | 0 | 0 | 0 | 1 | 16, 58                                       | 1 | 0 | 1 | 1 |
| CIN 3 | 40 | 52, 58 | 0 | 0 | 0 | 0 | 18, 53, 52,<br>45, 16, 35,<br>66, 11, 58, 56 | 0 | 0 | 0 | 1 |
| CIN 1 | 42 | 58     | 0 | 0 | 0 | 0 | 18, 45, 16,<br>52, 11, 53                    | 0 | 0 | 0 | 1 |
| CIN 1 | 21 | 16     | 0 | 0 | 0 | 1 | 16, 18                                       | 0 | 0 | 0 | 1 |
| CIN 2 | 29 | 16     | 1 | 1 | 0 | 1 | 16, 18                                       | 0 | 0 | 0 | 1 |
| CIN 2 | 26 | 16     | 0 | 0 | 0 | 1 | 16, 52, 18,<br>35, 53, 11                    | 1 | 1 | 0 | 1 |
| CIN 3 | 35 | 16     | 0 | 0 | 0 | 1 | 59, 42                                       | 0 | 0 | 0 | 0 |
| CIN 1 | 45 | 45     | 1 | 0 | 1 | 0 | 0                                            | 0 | 0 | 0 | 0 |
| CIN 3 | 31 | 16     | 0 | 0 | 0 | 1 | 16                                           | 1 | 1 | 0 | 1 |
| CIN 3 | 64 | 16     | 1 | 1 | 0 | 1 | 0                                            | 1 | 1 | 0 | 0 |
| CIN 3 | 43 | 45     | 1 | 1 | 0 | 0 | 42                                           | 0 | 0 | 0 | 0 |
| CIN 1 | 25 | 45     | 1 | 1 | 0 | 0 | 45                                           | 1 | 1 | 0 | 0 |
| CIN 1 | 43 | 45     | 1 | 1 | 0 | 0 | 35                                           | 1 | 1 | 0 | 0 |
| CIN 1 | 23 | 16     | 1 | 0 | 1 | 1 | 0                                            | 0 | 0 | 0 | 0 |
| CIN 1 | 24 | 16     | 1 | 1 | 0 | 1 | 16                                           | 0 | 0 | 0 | 1 |
| CIN 3 | 26 | 16     | 1 | 1 | 0 | 1 | 16, 42                                       | 0 | 0 | 0 | 1 |
| CIN 3 | 41 | 46     | 1 | 1 | 0 | 0 | 56, 18, 31,<br>53, 11                        | 1 | 1 | 0 | 0 |
| CIN 2 | 23 | 58     | 1 | 1 | 0 | 0 | 58                                           | 0 | 0 | 0 | 0 |
| CIN 1 | 27 | 16, 66 | 1 | 1 | 0 | 1 | 16, 52, 66,<br>53, 18, 42                    | 1 | 1 | 0 | 1 |
| CIN 2 | 57 | 16     | 0 | 0 | 0 | 1 | 58                                           | 0 | 0 | 0 | 0 |
| CIN 1 | 34 | 16     | 1 | 1 | 0 | 1 | 16, 58                                       | 1 | 1 | 0 | 1 |
| CIN 1 | 20 | 16     | 0 | 0 | 0 | 1 | 16, 33                                       | 0 | 0 | 0 | 1 |
| CIN 2 | 32 | 45     | 1 | 1 | 0 | 0 | 16                                           | 0 | 0 | 0 | 1 |
| CIN 2 | 33 | 45     | 0 | 0 | 0 | 0 | 31                                           | 1 | 1 | 0 | 0 |
| CIN 1 | 25 | 52     | 1 | 1 | 0 | 0 | 16, 33, 18, 59                               | 1 | 1 | 0 | 1 |
| CIN 1 | 48 | 16     | 1 | 1 | 0 | 1 | 16, 18                                       | 1 | 1 | 0 | 1 |
| CIN 1 | 38 | 0      | 1 | 1 | 0 | 0 | 0                                            | 0 | 0 | 0 | 0 |
| CIN 3 | 49 | 16     | 1 | 0 | 1 | 1 | 16                                           | 1 | 0 | 1 | 1 |
| CIN 1 | 23 | 0      | 1 | 1 | 0 | 0 | 59, 42                                       | 1 | 1 | 0 | 0 |
| CIN 2 | 25 | 52     | 0 | 0 | 0 | 0 | 31                                           | 1 | 1 | 0 | 0 |
| CIN 1 | 24 | 45, 56 | 1 | 1 | 0 | 0 | 56, 45, 6, 53                                | 1 | 1 | 0 | 0 |
| CIN 3 | 60 | 16     | 1 | 1 | 0 | 1 | 16                                           | 1 | 1 | 0 | 1 |
| CIN 1 | 21 | 51     | 1 | 1 | 0 | 0 | 53                                           | 0 | 0 | 0 | 0 |

## Clinical performance of HPV detection and genotyping in urine samples

|       |     |            |   |   |   |   |                                   |   |   |   |   |
|-------|-----|------------|---|---|---|---|-----------------------------------|---|---|---|---|
| CIN 3 | 40  | 16         | 1 | 1 | 0 | 1 | 0                                 | 0 | 0 | 0 | 0 |
| CIN 1 | 32  | 0          | 1 | 1 | 0 | 0 | 0                                 | 1 | 1 | 0 | 0 |
| CIN 2 | 35  | 18         | 1 | 0 | 1 | 0 | 16, 58, 18, 31, 45, 11            | 1 | 0 | 1 | 1 |
| CIN 2 | 19  | 31         | 1 | 1 | 0 | 0 | 18, 31, 66, 53                    | 0 | 0 | 0 | 0 |
| CIN 1 | 46  | 35         | 0 | 0 | 0 | 0 | 0                                 | 0 | 0 | 0 | 0 |
| CIN 1 | 24  | 16         | 0 | 0 | 0 | 1 | 16, 59, 35, 45, 42, 53            | 1 | 1 | 0 | 1 |
| CIN 1 | 49  | 0          | 1 | 1 | 0 | 0 | 16, 18, 52, 66, 45, 6, 53         | 1 | 0 | 1 | 1 |
| CIN 1 | 20  | 18, 45     | 0 | 0 | 0 | 0 | 18, 45                            | 1 | 1 | 0 | 0 |
| CIN 2 | 30  | 17         | 1 | 1 | 0 | 1 | 16                                | 1 | 1 | 0 | 1 |
| CIN 1 | 22  | 16         | 1 | 1 | 0 | 1 | 18, 45                            | 1 | 1 | 0 | 0 |
| CIN 1 | 35  | 45.16      | 1 | 1 | 0 | 1 | 35                                | 1 | 1 | 0 | 0 |
| CIN 1 | 38  | 16         | 1 | 1 | 0 | 1 | 0                                 | 1 | 1 | 0 | 0 |
| CIN 2 | 35  | 0          | 1 | 1 | 0 | 0 | 16, 56, 33, 58, 18, 35, 45, 6, 42 | 0 | 0 | 0 | 1 |
| CIN 1 | 21  | 16         | 1 | 1 | 0 | 1 | 16                                | 1 | 1 | 0 | 1 |
| CIN 1 | 35  | 0          | 1 | 0 | 1 | 0 | 11                                | 1 | 1 | 0 | 0 |
| CIN 1 | 33  | 0          | 1 | 1 | 0 | 0 | 56, 51                            | 1 | 1 | 0 | 0 |
| CIN 2 | 30  | 16, 18, 37 | 1 | 1 | 0 | 1 | 16, 33, 35, 42                    | 1 | 1 | 0 | 1 |
| CIN 1 | 19  | 70         | 1 | 1 | 0 | 0 | 70                                | 1 | 1 | 0 | 0 |
| CIN 1 | 26  | 16, 52     | 1 | 1 | 0 | 1 | 16                                | 1 | 1 | 0 | 1 |
| CIN 1 | 25  | 0          | 1 | 1 | 0 | 0 | 16, 18, 31, 35, 45, 6, 70         | 0 | 0 | 0 | 1 |
| CIN 1 | 42  | 52         | 1 | 1 | 0 | 0 | 31, 6, 70                         | 1 | 1 | 0 | 0 |
| CIN 1 | 19  | 16         | 1 | 1 | 0 | 1 | 56, 6                             | 1 | 1 | 0 | 0 |
| SCC   | 52  | 16         | 1 | 1 | 0 | 1 | 16, 11                            | 1 | 1 | 0 | 1 |
| CIN 1 | 61  | 45         | 1 | 1 | 0 | 0 | 0                                 | 1 | 1 | 0 | 0 |
| CIN 1 | 18  | 51         | 1 | 1 | 0 | 0 | 0                                 | 1 | 1 | 0 | 0 |
| CIN 1 | 35  | 18         | 0 | 0 | 0 | 0 | 18, 45, 35                        | 1 | 1 | 0 | 0 |
| CIN 1 | 27  | 33, 59     | 1 | 1 | 0 | 0 | 59, 42, 35                        | 1 | 0 | 1 | 0 |
| SCC   | 46  | 16         | 1 | 1 | 0 | 1 | 0                                 | 1 | 1 | 0 | 0 |
| CIN 1 | 17  | 51         | 1 | 1 | 0 | 0 | 51                                | 1 | 1 | 0 | 0 |
| CIN 2 | 52  | 16-18      | 1 | 1 | 0 | 1 | 56, 18, 31, 53                    | 1 | 1 | 0 | 0 |
| CIN 3 | 35  | 16         | 0 | 0 | 0 | 1 | 16, 18                            | 1 | 0 | 1 | 1 |
| CIN 1 | 19. | 70         | 0 | 0 | 0 | 0 | 70                                | 1 | 1 | 0 | 0 |
| CIN 3 | 33  | 16         | 1 | 1 | 0 | 1 | 16, 11                            | 1 | 1 | 0 | 1 |
| SCC   |     | 16         | 1 | 1 | 0 | 1 | 16, 18                            | 1 | 1 | 0 | 1 |
| SCC   | 56  | 16         | 1 | 1 | 0 | 1 | 18                                | 1 | 1 | 0 | 0 |
| CIN 1 | 40  | 16         | 1 | 0 | 1 | 1 | 59, 42, 53                        | 1 | 1 | 0 | 0 |
| CIN 1 | 48  | 16         | 0 | 0 | 0 | 1 | 0                                 | 1 | 1 | 0 | 0 |

## Clinical performance of HPV detection and genotyping in urine samples

|       |    |          |   |   |   |   |                                             |   |   |   |   |
|-------|----|----------|---|---|---|---|---------------------------------------------|---|---|---|---|
| CIN 1 | 23 | 0        | 1 | 1 | 0 | 0 | 0                                           | 1 | 1 | 0 | 0 |
| CIN 3 | 55 | 31       | 1 | 1 | 0 | 0 | 59                                          | 1 | 1 | 0 | 0 |
| CIN 2 | 50 | 52       | 1 | 1 | 0 | 0 | 52, 42, 53,<br>18, 16, 59,<br>45, 11        | 1 | 1 | 0 | 1 |
| CIN 2 | 26 | 33       | 1 | 1 | 0 | 0 | 33, 42                                      | 1 | 1 | 0 | 0 |
| CIN 3 | 33 | 52       | 1 | 1 | 0 | 0 | 42                                          | 1 | 1 | 0 | 0 |
| CIN 3 | 45 | 31       | 0 | 0 | 0 | 0 | 16, 18, 52                                  | 1 | 1 | 0 | 1 |
| SCC   | 35 | 0        | 1 | 1 | 0 | 0 | 58                                          | 1 | 1 | 0 | 0 |
| CIN 3 | 58 | 0        | 1 | 1 | 0 | 0 | 42                                          | 1 | 1 | 0 | 0 |
| CIN 3 | 36 | 0        | 1 | 1 | 0 | 0 | 0                                           | 1 | 1 | 0 | 0 |
| CIN 1 | 30 | 0        | 1 | 1 | 0 | 0 | 52, 66                                      | 1 | 1 | 0 | 0 |
| CIN 1 | 50 | 18       | 1 | 1 | 0 | 0 | 11                                          | 1 | 1 | 0 | 0 |
| CIN 1 | 23 | 66       | 1 | 1 | 0 | 0 | 52, 66, 53                                  | 1 | 1 | 0 | 0 |
| CIN 3 | 37 | 16       | 1 | 1 | 0 | 1 | 33, 18                                      | 0 | 0 | 0 | 0 |
| CIN 3 | 21 | 16       | 1 | 1 | 0 | 1 | 16, 18, 11                                  | 1 | 1 | 0 | 1 |
| CIN 1 | 23 | 0        | 1 | 0 | 1 | 0 | 58, 11                                      | 1 | 1 | 0 | 0 |
| CIN 2 | 26 | 16       | 1 | 1 | 0 | 1 | 18                                          | 1 | 1 | 0 | 0 |
| CIN 3 | 37 | 16       | 1 | 1 | 0 | 1 | 16, 11                                      | 1 | 1 | 0 | 1 |
| CIN 1 | 20 | 0        | 1 | 1 | 0 | 0 | 56, 11                                      | 1 | 1 | 0 | 0 |
| CIN 2 | 24 | 66       | 1 | 1 | 0 | 0 | 16, 18, 59,<br>52, 66, 42,<br>53, 11        | 1 | 1 | 0 | 1 |
| CIN 3 | 60 | 33       | 1 | 1 | 0 | 0 | 11, 16, 18, 59                              | 1 | 1 | 0 | 1 |
| CIN 1 | 25 | 16       | 1 | 1 | 0 | 1 | 16                                          | 1 | 1 | 0 | 1 |
| CIN 3 | 40 | 31,56,58 | 1 | 1 | 0 | 0 | 16, 18                                      | 1 | 1 | 0 | 1 |
| CIN 3 | 34 | 0        | 1 | 1 | 0 | 0 | 16, 18, 59, 52,<br>35, 66, 45, 6,<br>42, 11 | 1 | 1 | 0 | 1 |
| CIN 2 | 31 | 31       | 1 | 1 | 0 | 0 | 31, 35, 53,<br>18, 16                       | 1 | 1 | 0 | 1 |
| CIN 1 | 51 | 51       | 1 | 1 | 0 | 0 | 18, 53, 11, 16,<br>45, 35                   | 1 | 1 | 0 | 1 |
| CIN 1 | 40 | 16, 52   | 0 | 0 | 0 | 1 | 16, 52, 42                                  | 1 | 1 | 0 | 1 |
| CIN 1 | 24 | 56       | 1 | 1 | 0 | 0 | 56, 35                                      | 1 | 1 | 0 | 0 |
| CIN 1 | 55 | 58       | 1 | 1 | 0 | 0 | 16, 58, 18, 52,<br>31, 45, 11               | 1 | 1 | 0 | 1 |
| CIN 2 | 33 | 16       | 1 | 1 | 0 | 1 | 16                                          | 1 | 1 | 0 | 1 |
| CIN 1 | 25 | 0        | 1 | 1 | 0 | 0 | 58, 18, 51, 53                              | 1 | 1 | 0 | 0 |
| SCC   | 38 | 18       | 1 | 1 | 0 | 0 | 18                                          | 1 | 1 | 0 | 0 |
| SCC   | 27 | 53       | 1 | 0 | 1 | 0 | 53                                          | 1 | 1 | 0 | 0 |
| SCC   | 43 | 42, 53   | 1 | 1 | 0 | 0 | 16, 18, 35                                  | 1 | 1 | 0 | 1 |

## Clinical performance of HPV detection and genotyping in urine samples

|        |    |          |   |   |   |   |                       |   |   |   |   |
|--------|----|----------|---|---|---|---|-----------------------|---|---|---|---|
| SCC    | 66 | 31       | 1 | 1 | 0 | 0 | 33, 58, 18,<br>31, 53 | 1 | 1 | 0 | 0 |
| SCC    | 37 | 0        | 1 | 1 | 0 | 0 | 16, 18                | 1 | 1 | 0 | 1 |
| SCC    | 75 | 0        | 1 | 1 | 0 | 0 | 16, 53                | 1 | 1 | 0 | 1 |
| SCC    | 29 | 18       | 1 | 1 | 0 | 0 | 18, 42                | 0 | 0 | 0 | 0 |
| No CIN | 26 | 16       | 1 | 1 | 0 | 1 | 18                    | 1 | 0 | 1 | 0 |
| No CIN | 47 | 16,45,58 | 1 | 1 | 0 | 1 | 58                    | 0 | 0 | 0 | 0 |
| No CIN | 38 | 0        | 1 | 1 | 0 | 0 | 0                     | 1 | 1 | 0 | 0 |
| No CIN | 39 | 0        | 1 | 1 | 0 | 0 | 0                     | 1 | 1 | 0 | 0 |
| No CIN | 42 | 0        | 1 | 1 | 0 | 0 | 0                     | 1 | 1 | 0 | 0 |
| No CIN | 32 | 0        | 1 | 1 | 0 | 0 | 0                     | 1 | 1 | 0 | 0 |
| No CIN | 22 | 53       | 1 | 1 | 0 | 1 | 16                    | 1 | 1 | 0 | 1 |
| No CIN | 27 | 0        | 1 | 1 | 0 | 0 | 0                     | 1 | 1 | 0 | 0 |
| No CIN | 36 | 0        | 1 | 1 | 0 | 0 | 0                     | 1 | 1 | 0 | 0 |
| No CIN | 38 | 0        | 1 | 1 | 0 | 0 | 0                     | 1 | 1 | 0 | 0 |
| No CIN | 28 | 0        | 1 | 1 | 0 | 0 | 53                    | 0 | 0 | 0 | 0 |
| No CIN | 49 | 0        | 1 | 1 | 0 | 0 | 0                     | 1 | 0 | 1 | 0 |
| No CIN | 36 | 0        | 1 | 1 | 0 | 0 | 0                     | 1 | 1 | 0 | 0 |
| No CIN | 22 | 0        | 1 | 1 | 0 | 0 | 0                     | 1 | 1 | 0 | 0 |
| No CIN | 28 | 0        | 1 | 1 | 0 | 0 | 0                     | 1 | 1 | 0 | 0 |
| No CIN | 43 | 0        | 1 | 1 | 0 | 0 | 0                     | 1 | 1 | 0 | 0 |
| No CIN | 15 | 0        | 1 | 1 | 0 | 0 | 0                     | 0 | 0 | 0 | 0 |
| No CIN | 41 | 0        | 1 | 1 | 0 | 0 | 0                     | 1 | 1 | 0 | 0 |
| No CIN | 47 | 0        | 1 | 1 | 0 | 0 | 0                     | 1 | 1 | 0 | 0 |
| No CIN | 32 | 11       | 1 | 1 | 0 | 0 | 0                     | 1 | 1 | 0 | 0 |
| No CIN | 19 | 0        | 1 | 1 | 0 | 0 | 0                     | 1 | 0 | 1 | 0 |
| No CIN | 28 | 56       | 1 | 1 | 0 | 0 | 0                     | 1 | 1 | 0 | 0 |
| No CIN | 26 | 0        | 0 | 0 | 0 | 0 | 0                     | 1 | 0 | 1 | 0 |
| No CIN | 20 | 0        | 0 | 0 | 0 | 0 | 0                     | 0 | 0 | 0 | 0 |
| No CIN | 53 | 0        | 1 | 1 | 0 | 0 | 52                    | 1 | 1 | 0 | 0 |
| No CIN | 40 | 0        | 1 | 1 | 0 | 0 | 42                    | 1 | 1 | 0 | 0 |
| No CIN | 37 | 0        | 1 | 1 | 0 | 0 | 0                     | 1 | 1 | 0 | 0 |
| No CIN | 34 | 0        | 1 | 1 | 0 | 0 | 0                     | 1 | 1 | 0 | 0 |
| No CIN | 47 | 0        | 1 | 1 | 0 | 0 | 0                     | 1 | 1 | 0 | 0 |
| No CIN | 27 | 58       | 0 | 0 | 0 | 0 | 0                     | 1 | 1 | 0 | 0 |
| No CIN | 50 | 0        | 1 | 1 | 0 | 0 | 56                    | 1 | 1 | 0 | 0 |
| No CIN | 21 | 0        | 1 | 1 | 0 | 0 | 16, 18, 51            | 1 | 1 | 0 | 1 |
| No CIN | 20 | 0        | 1 | 1 | 0 | 0 | 0                     | 1 | 1 | 0 | 0 |
| No CIN | 21 | 35       | 1 | 1 | 0 | 0 | 16, 35                | 1 | 1 | 0 | 1 |
| No CIN | 24 | 0        | 1 | 1 | 0 | 0 | 0                     | 1 | 1 | 0 | 0 |
| No CIN | 32 | 0        | 1 | 1 | 0 | 0 | 0                     | 0 | 0 | 0 | 0 |

## Clinical performance of HPV detection and genotyping in urine samples

|        |    |    |   |   |   |   |    |   |   |   |   |
|--------|----|----|---|---|---|---|----|---|---|---|---|
| No CIN | 31 | 0  | 1 | 1 | 0 | 0 | 51 | 1 | 1 | 0 | 0 |
| No CIN | 53 | 0  | 1 | 1 | 0 | 0 | 53 | 1 | 1 | 0 | 0 |
| No CIN | 41 | 0  | 0 | 0 | 0 | 0 | 0  | 1 | 1 | 0 | 0 |
| No CIN | 42 | 0  | 1 | 1 | 0 | 0 | 0  | 1 | 1 | 0 | 0 |
| No CIN | 40 | 0  | 1 | 1 | 0 | 0 | 0  | 1 | 1 | 0 | 0 |
| No CIN | 56 | 16 | 1 | 0 | 1 | 1 | 0  | 1 | 1 | 0 | 0 |
| No CIN | 39 | 0  | 1 | 1 | 0 | 0 | 18 | 1 | 1 | 0 | 0 |
| No CIN | 24 | 0  | 0 | 0 | 0 | 0 | 0  | 1 | 1 | 0 | 0 |
| No CIN | 28 | 53 | 0 | 0 | 0 | 0 | 0  | 1 | 1 | 0 | 0 |
| No CIN | 28 | 0  | 1 | 1 | 0 | 0 | 18 | 1 | 1 | 0 | 0 |

CIN: Cervical Intraepithelial Neoplasia; SCC: Squamous Cervical Cancer
